# Supplementary material for: Dual blockade of CD47 and HER2 eliminates radioresistant breast cancer cells
Source: PubMed Central journal article supplement (PMC7490264; doi:10.1038/s41467-020-18245-7), 2020-09-14
Supplement: 41467_2020_18245_MOESM1_ESM.pdf [file 41467_2020_18245_MOESM1_ESM.pdf]

# **Supplementary Information**

Dual blockade of CD47 and HER2 eliminates  
radioresistant breast cancer cells

Candas-Green et al.

## **This file contains:**

Supplementary Figures 1-10

Supplementary Table 1

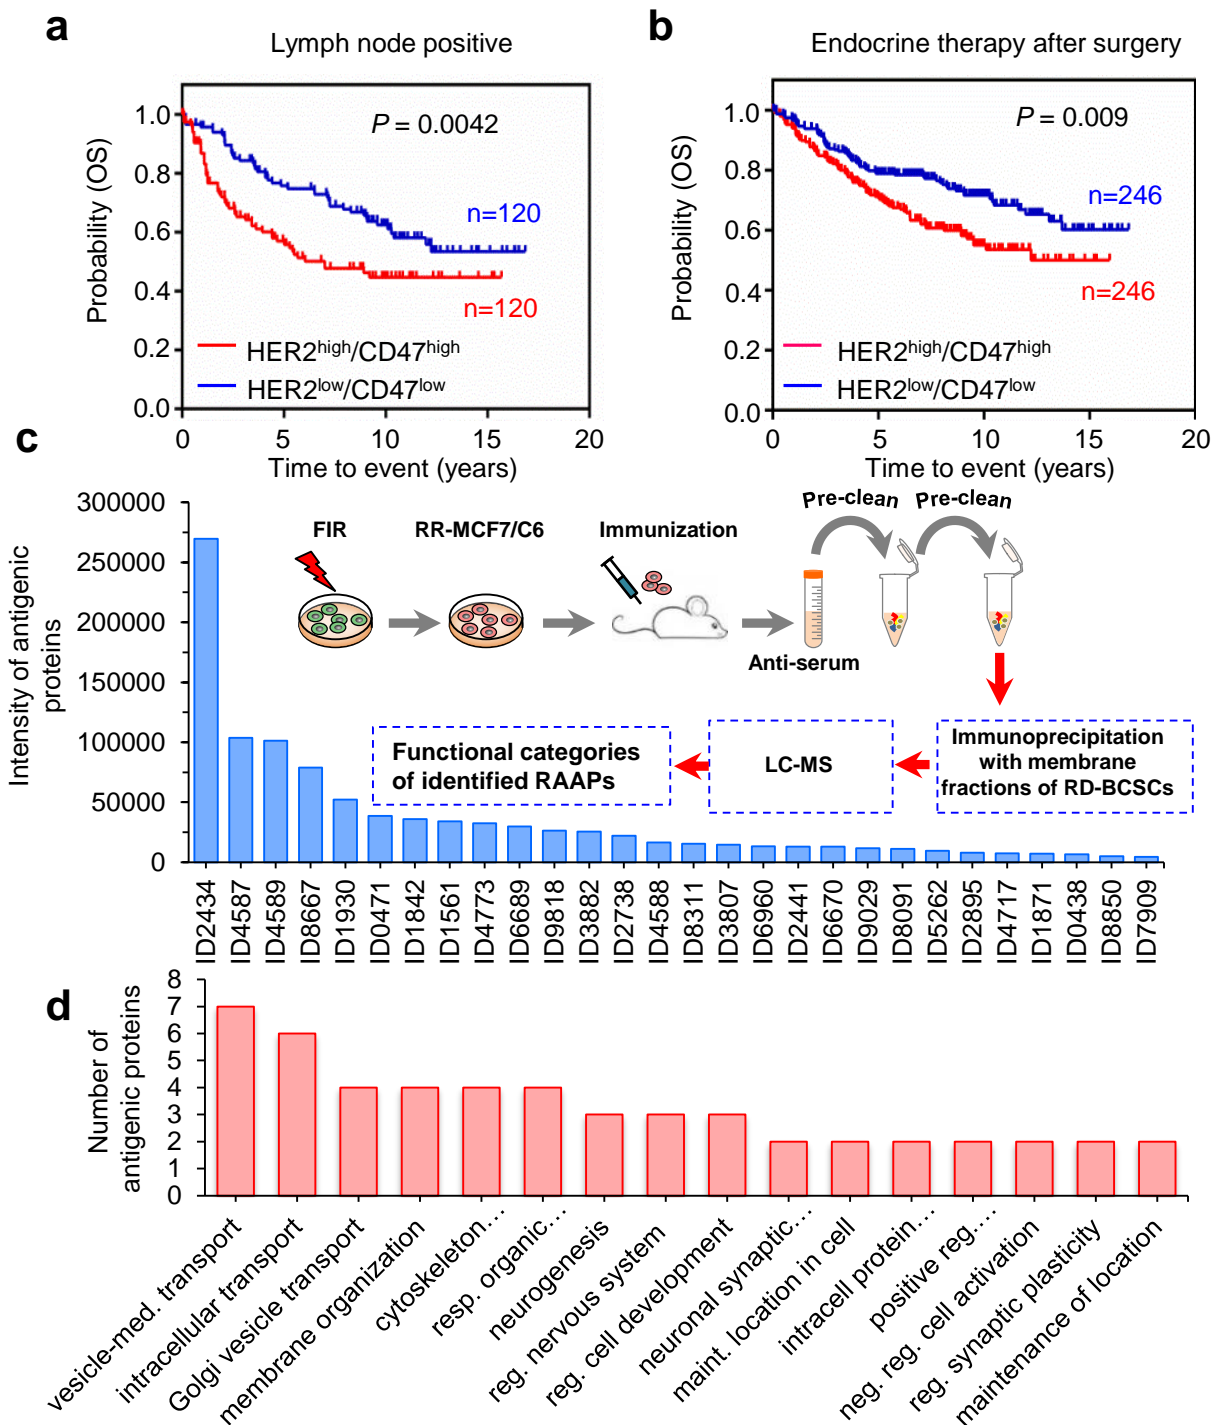

**Supplementary Figure 1.** (a) Co-expression of CD47 and HER2 in overall survival (OS) of BC patients with lymph nodes metastasis and (b) BC patients received endocrine therapy after surgery, from Breast Cancer Meta-base: 10 cohorts 22k genes database generated by SurvExpress

(<http://bioinformatica.mty.itesm.mx:8080/Biomatec/SurvivaX.jsp>) from the HER2 probe 210930\_s\_at

combined CD47 probe 211075\_s\_at. Statistical significance was analyzed by log-rank test. (c) Insert:

scheme for generation of antiserum of radioresistant BC cells. A cluster of radiation associate antigenic proteins (RAAPs) including CD47 and HER2 were identified from the anti-serum of mice immunized with MCF7/C6 cells derived from radioresistant MCF7 cells. The RAAPs were detected through pre-cleaning via incubation with normal breast epithelial MCF10A and then breast cancer MCF7, and immunoprecipitated with membrane proteins of RD-BCSCs. The immunoprecipitated membrane proteins were analyzed with LC-MS and grouped with richness in expression. (d) Functional categories of identified RAAPs.

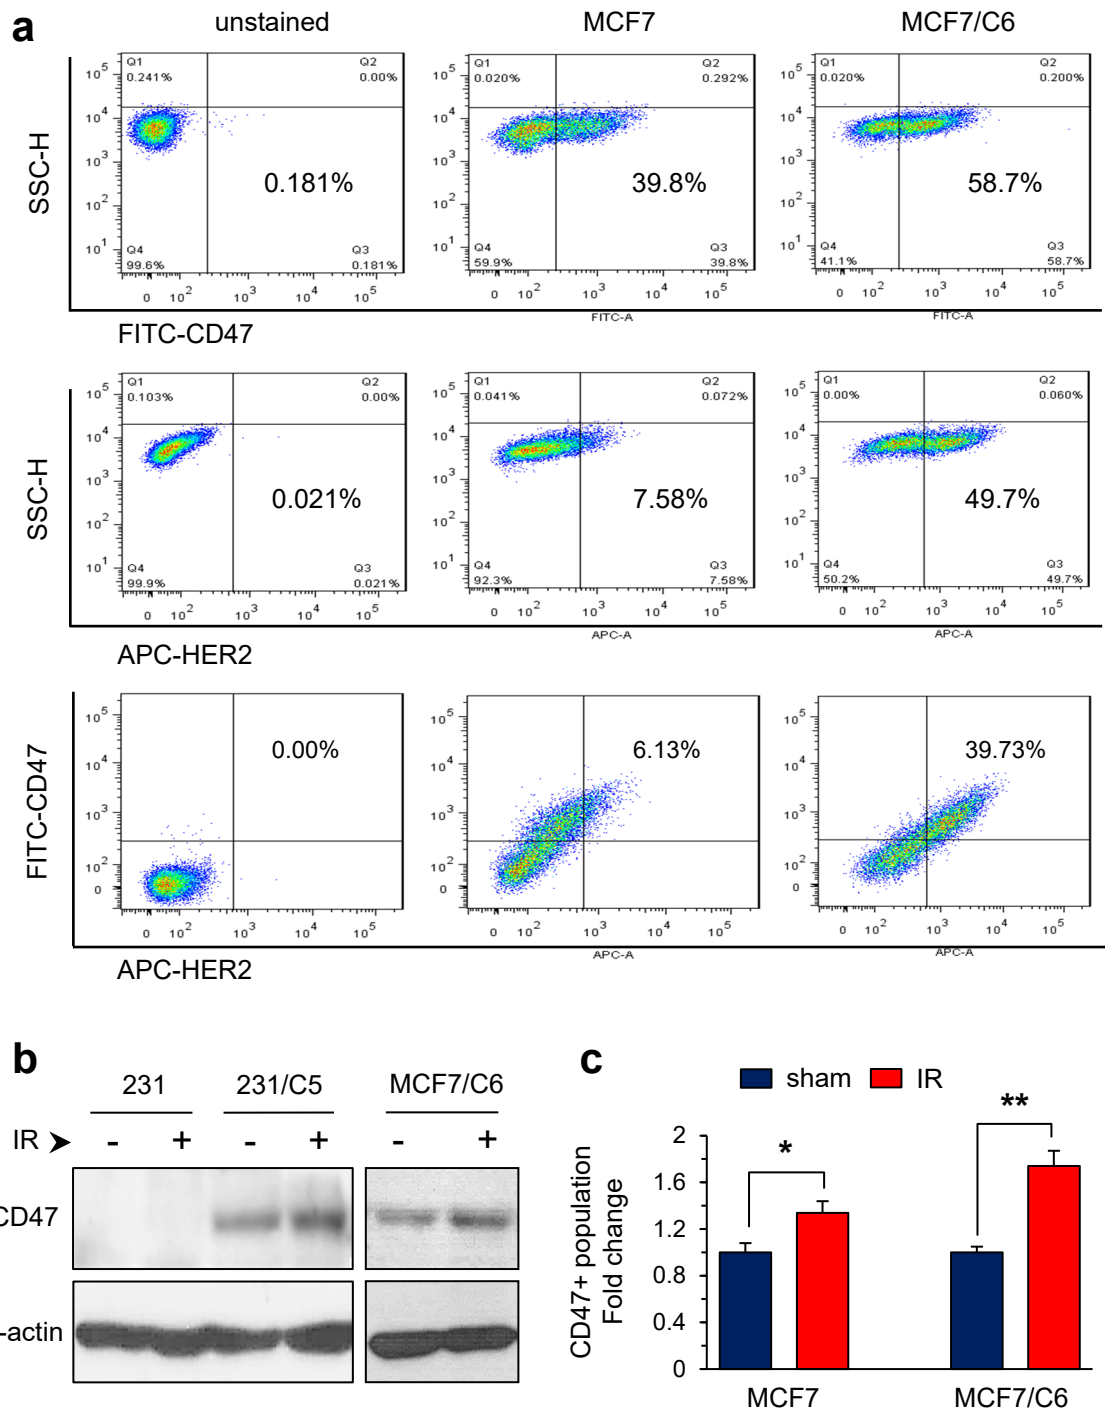

**Supplementary Figure 2. Co-expression of HER2 and CD47 is enhanced in radioresistant BC cells.**

(a) Flow cytometry analysis of CD47<sup>+</sup>, HER2<sup>+</sup> or CD47<sup>+</sup>/HER2<sup>+</sup> populations in wild type MCF7 and radioresistant MCF7/C6 cells. (b) Immunoblotting of CD47 in sham and IR-treated MDA-MB-231(231) and radioresistant MDA-MB-231/C5 and MCF7/C6 cells. (c) Flow cytometry analysis of CD47<sup>+</sup> population in MCF7 and MCF7/C6 cells with or without 5 Gy IR (n = 3; \*P < 0.05, \*\*P < 0.01).

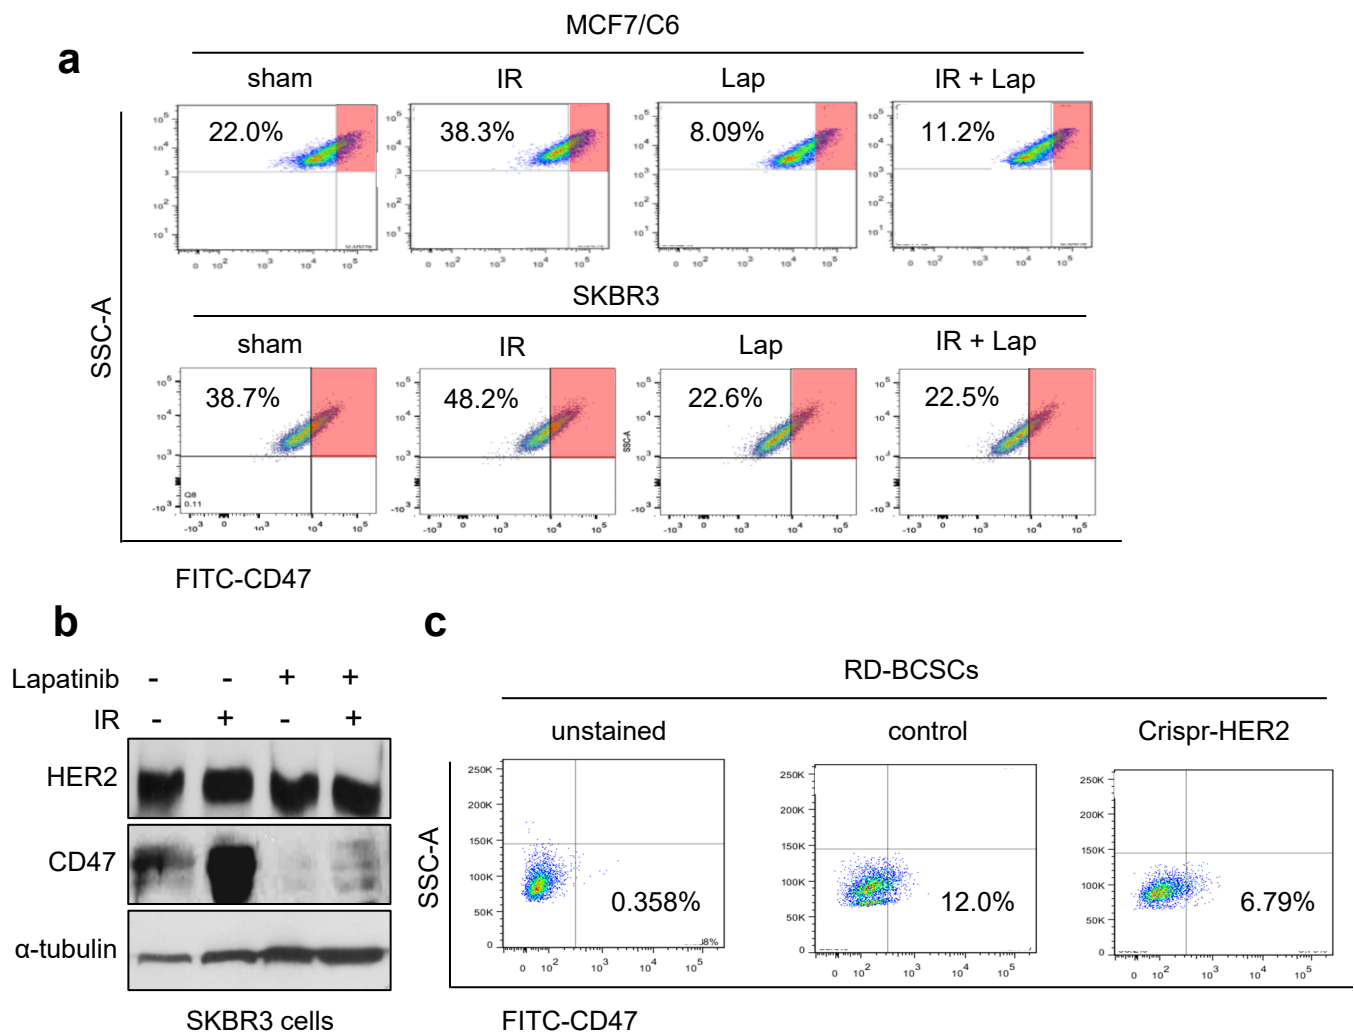

**Supplementary Figure 3. Antibody blockage of HER2 or CRISPR/Cas9-KO HER2 reduces CD47 expression and CD47<sup>+</sup> cell population.**

(a) Gating strategy for flow cytometry analysis of CD47<sup>+</sup> cells in MCF7/C6 or SKBR3 cells treated with Lapatinib, IR (5 Gy) or Lapatinib (10 μM Lapatinib for 72 h) followed by IR (n=3). (b) Immunoblotting of HER2 and CD47 in SKBR3 cells treated with Lapatinib, IR or Lapatinib followed by IR. (c) CD47<sup>+</sup> cells in HER2<sup>+</sup> RR-BCSCs and the counterparts of CRISPR-KO HER2.



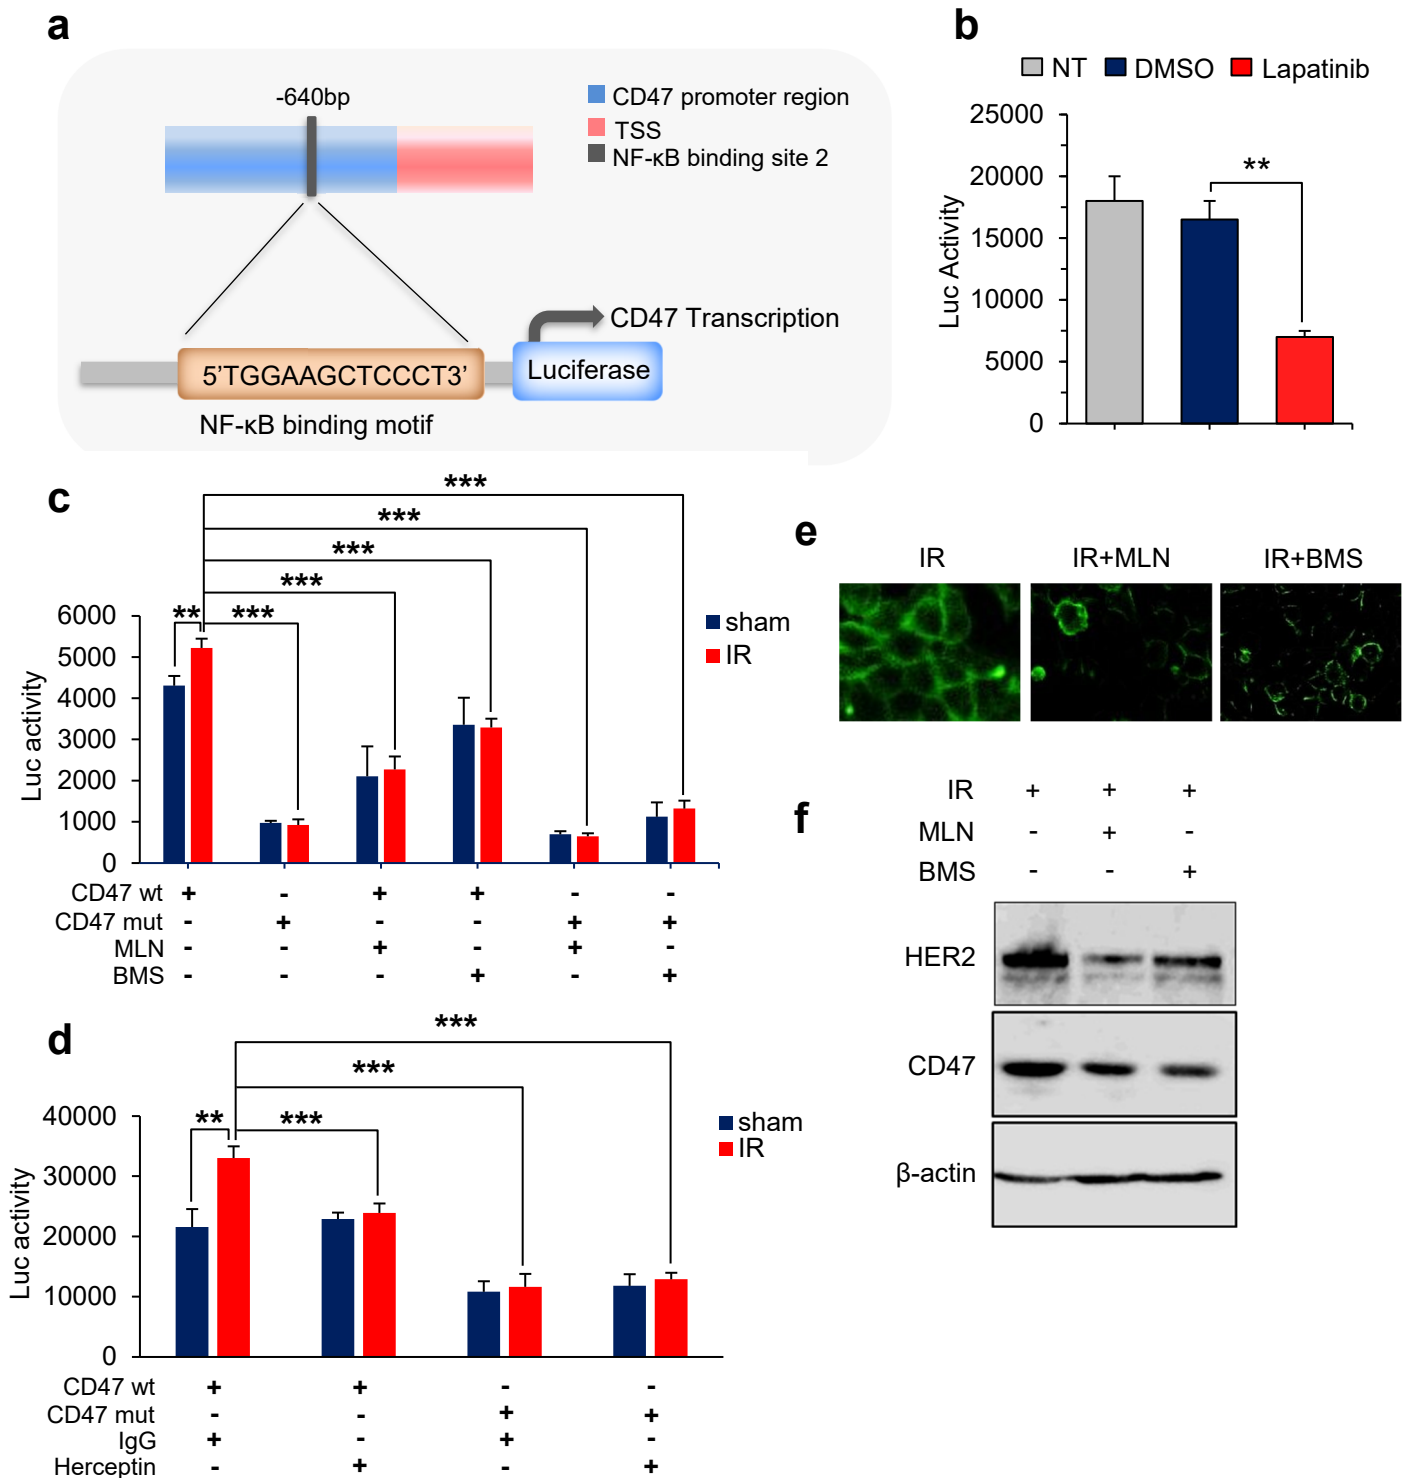

**Supplementary Figure 4. NF- $\kappa$ B controls CD47 promoter transactivation.** (a) Schematic of human CD47 promoter region near transcriptional starting site (TSS) with a putative NF- $\kappa$ B binding sequence -640bp (5'TGGAAGCTCCCT3', used for Luciferase reporter construction). (b) Human CD47 promoter region (-640bp) cloned into pGL2-basic plasmid and the CD47-luciferase activity was measured in MCF7/C6 cells with or without Lapatinib treatment. NT, no treatment; RLU (relative luciferase units; 10  $\mu$ M Lapatinib for 72 h; DMSO as solvent control; n=3, \*\* $P$  < 0.01). (c) CD47 promoter activity with wild type or mutant NF- $\kappa$ B binding motif measured in control and irradiated MCF7/C6 cells in the presence or absence of NF- $\kappa$ B inhibitor MLN120B (MLN, 20  $\mu$ M) or BMS-34554 (BMS, 20  $\mu$ M, 15 h; n = 3, \*\* $P$  < 0.01, \*\*\* $P$  < 0.001). (d) CD47 promoter activity with wild type or mutant NF- $\kappa$ B binding motif measured in control and irradiated MCF7/C6 cells in the presence or absence of Herceptin (10  $\mu$ g/ml, 3 days; n = 3, \*\* $P$  < 0.01, \*\*\* $P$  < 0.001). (e) Representative images of immunofluorescence of CD47 in irradiated MCF7/C6 cells pretreated with MLN (20  $\mu$ M) or BMS (20  $\mu$ M), CD47 was visualized by confocal microscope 16 h after IR. (f) Immunoblotting of CD47 and HER2 in IR-treated MCF7/C6 cells with or without MLN (20  $\mu$ M) or BMS (20  $\mu$ M).

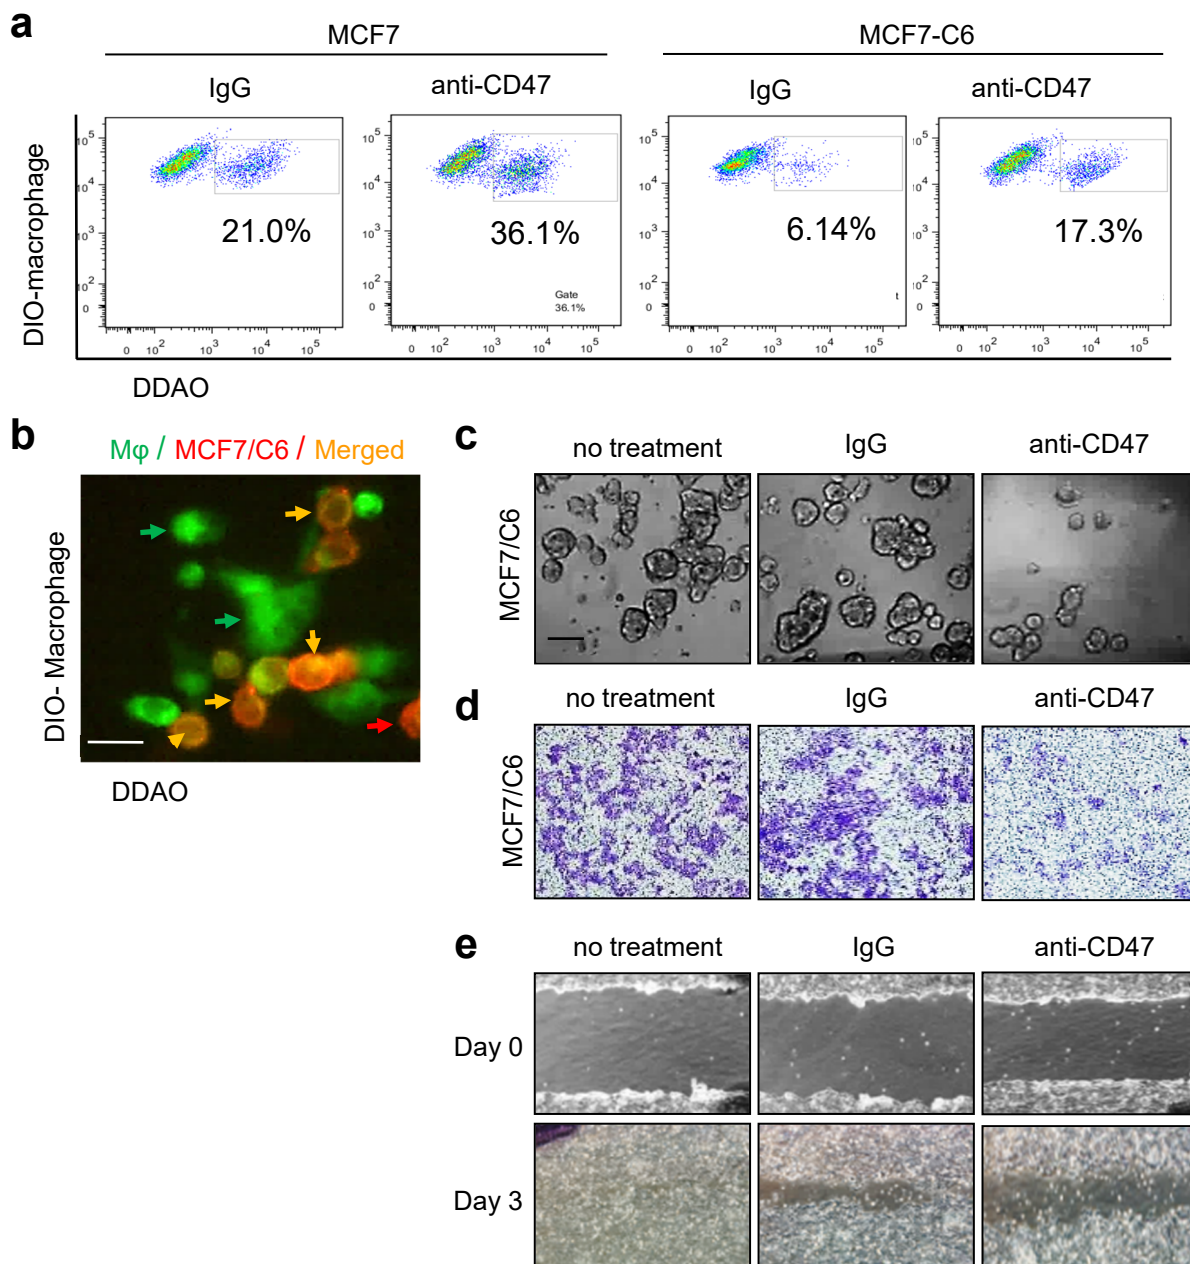

**Supplementary Figure 5. Antibody blocking CD47 not only enhances macrophage phagocytosis but also inhibits in vitro cell aggressive growth.**

(a) Flow cytometry analysis of macrophage phagocytosis on MCF7 and MCF7/C6 cells with or without antibody blockage of CD47. (b) Representative immunofluorescence staining of macrophage-mediated phagocytosis; orange color represents MCF7/C6 cells (red, DDAO) phagocytosed by a mature macrophage (derived from green THP1, DIO; scale bar, 25  $\mu$ m). The anti-CD47 mediated inhibition on in vitro aggressive growth of MCF7/C6 was detected by mammosphere formation (c), transwell invasion (d) and gap filling assay (e) with no treatment and IgG included as controls; scale bar = 100  $\mu$ m.

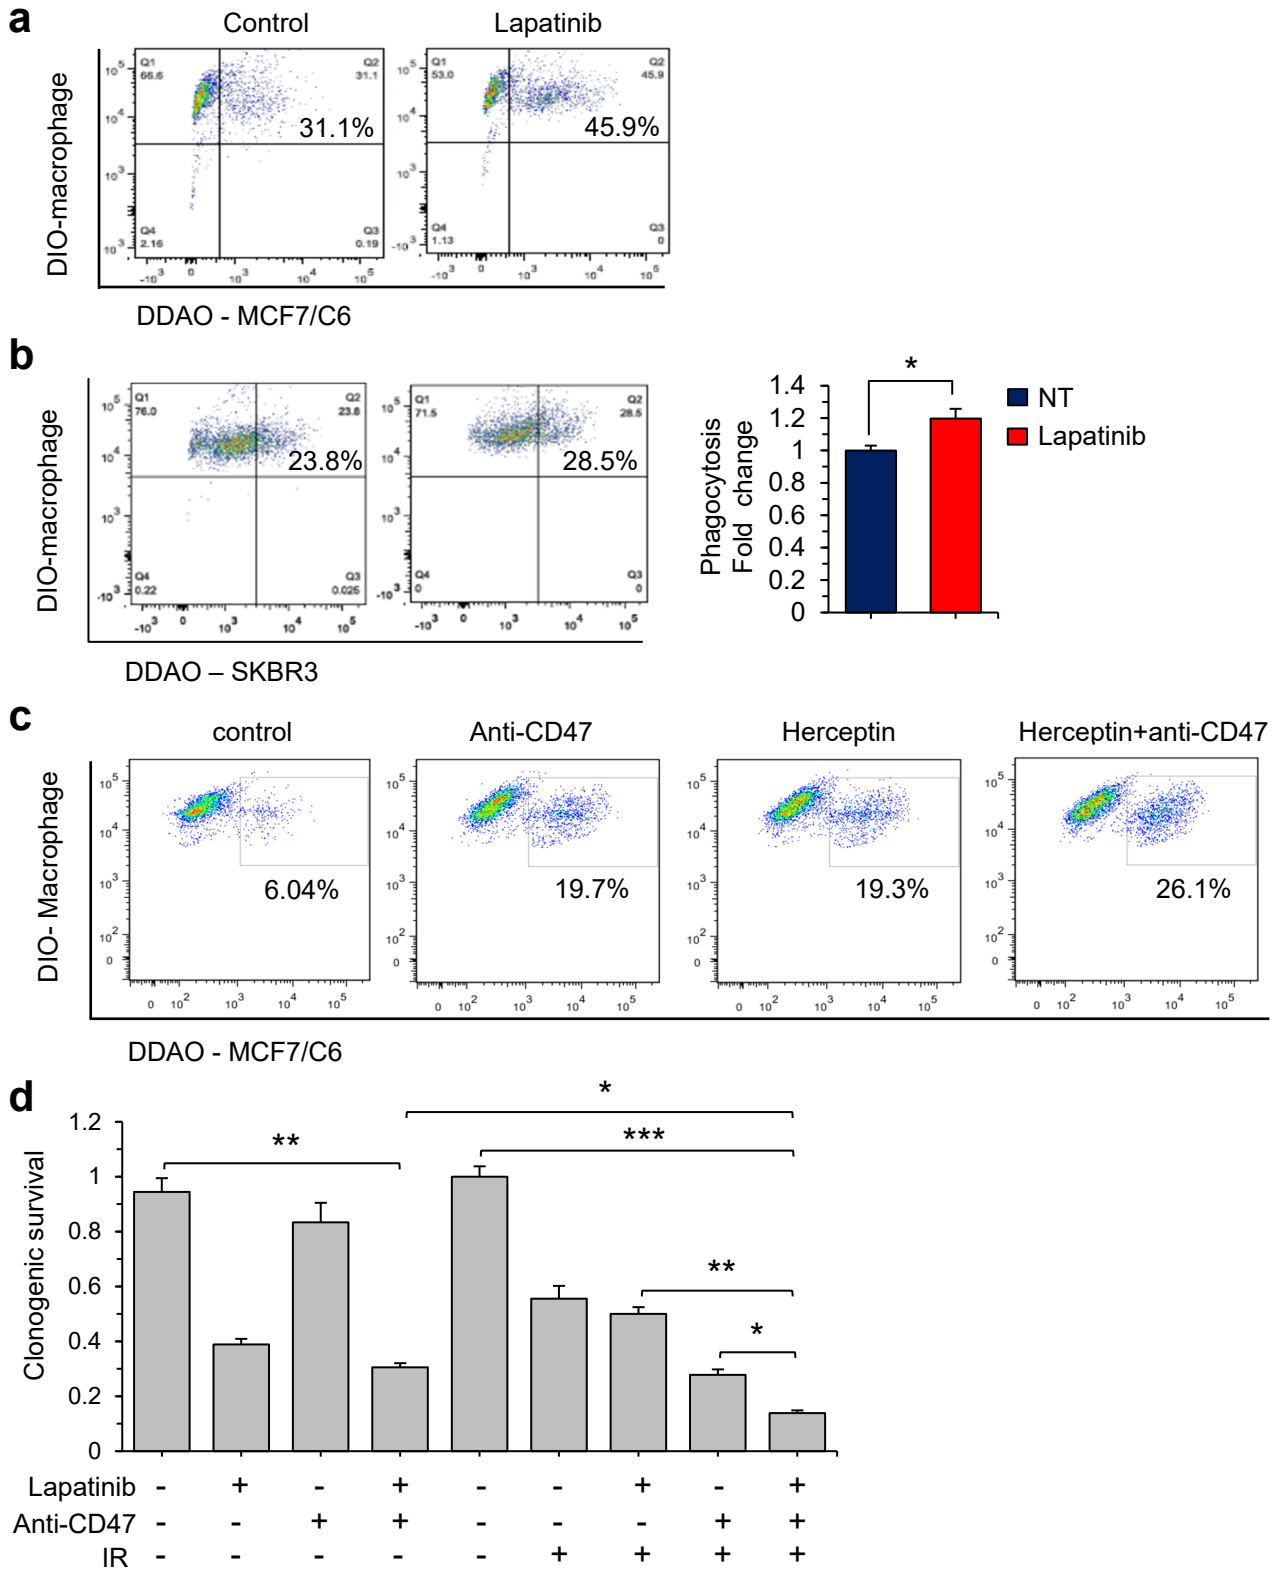

**Supplementary Figure 6. Antibody blocking HER2 enhances macrophage phagocytosis and radiosensitizes cells.**

(a) Gating strategy for macrophage phagocytosis on MCF7/C6 cells with or without HER2 blockage by Lapatinib. (b) Enhanced macrophage phagocytosis on HER2-expressing SKBR3 cells treated with Lapatinib measured by flow cytometry and quantified in right (n = 3; \*P < 0.05). (c) Flow cytometry analysis of enhanced macrophage phagocytosis on MCF7/C6 cells treated with combination of Herceptin and anti-CD47. (d) Clonogenic survival of HER2-expressing SKBR3 cells treated with different combinations of anti-CD47, Lapatinib, and IR (IgG and anti-CD47 antibody were applied with 10 µg/ml for overnight, Lapatinib was applied with 10 µM for 72 h prior to survival assay; IR = 5 Gy (n = 3, \*P < 0.05, \*\*P < 0.01, \*\*\*P < 0.001).

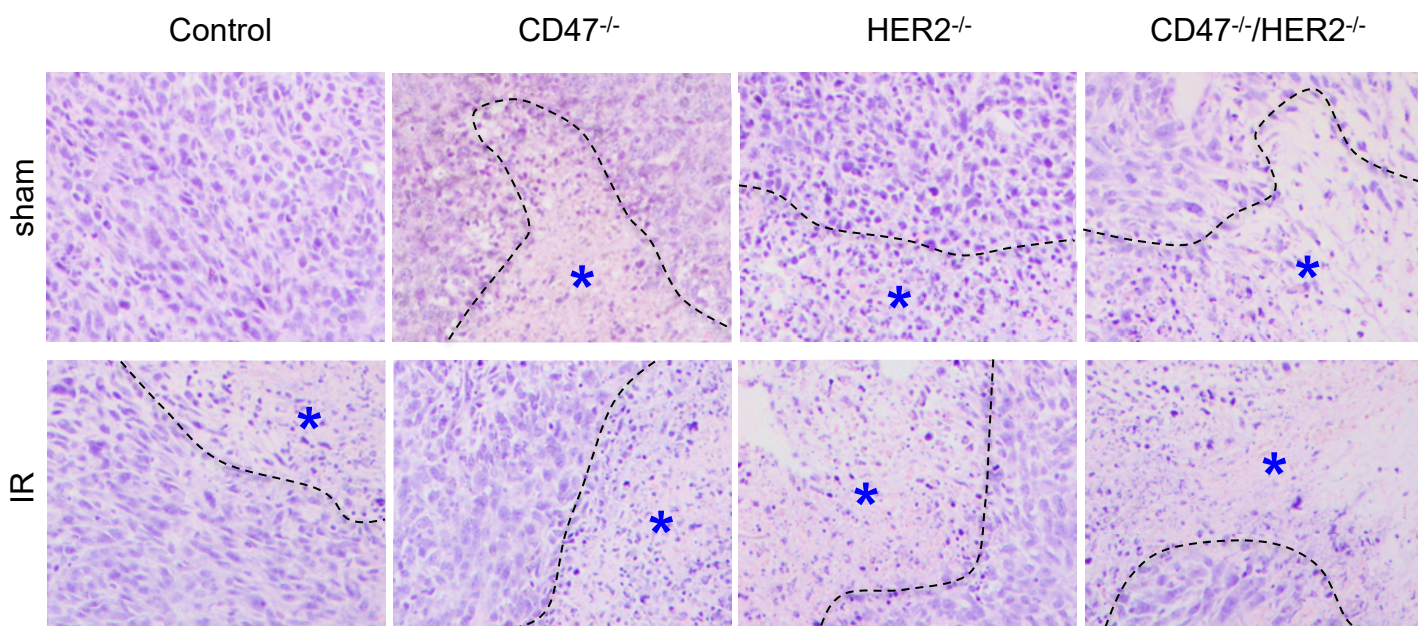

**Supplementary Figure 7. Histological features of CD47<sup>-/-</sup>, HER2<sup>-/-</sup>, CD47<sup>-/-</sup>/HER2<sup>-/-</sup> tumors.** Pleomorphic tumor cells with obvious mitoses were detected in control tumors, whereas less proliferative feature and increased necrosis and apoptosis were detected in the CD47<sup>-/-</sup>, HER2<sup>-/-</sup> tumors and mostly enhanced in the CD47<sup>-/-</sup>/HER2<sup>-/-</sup> tumors. The necrosis areas were circled by dash line and marked with an asterisk.

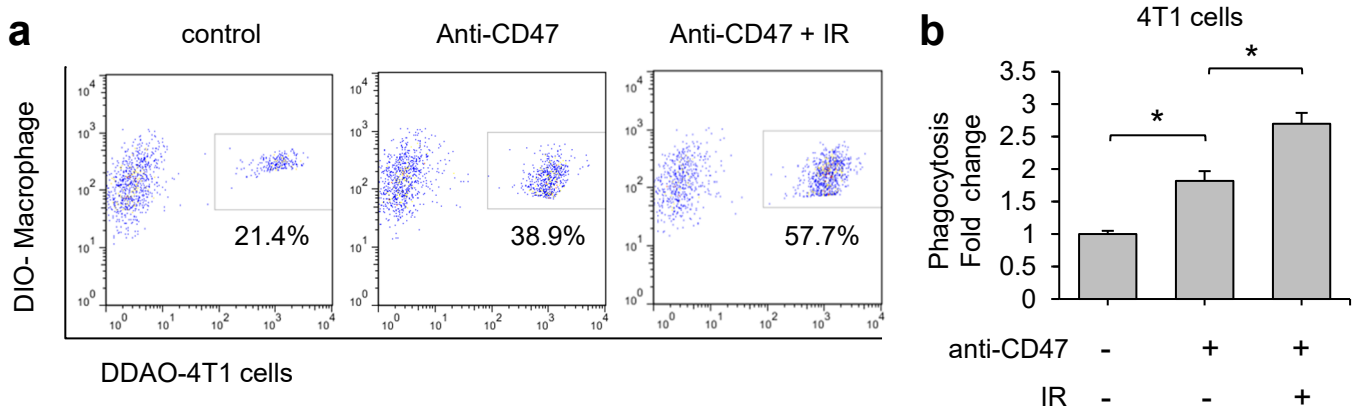

**Supplementary Figure 8. RT combined with antibody blocking CD47 enhances macrophage phagocytosis.** (a) Flow cytometry analysis of macrophage-mediated phagocytosis on mouse breast cancer 4T1 cells treated with anti-CD47 antibody with or without 5 Gy IR. (b) Quantitation of A,  $n = 3$  \* $P < 0.05$ .



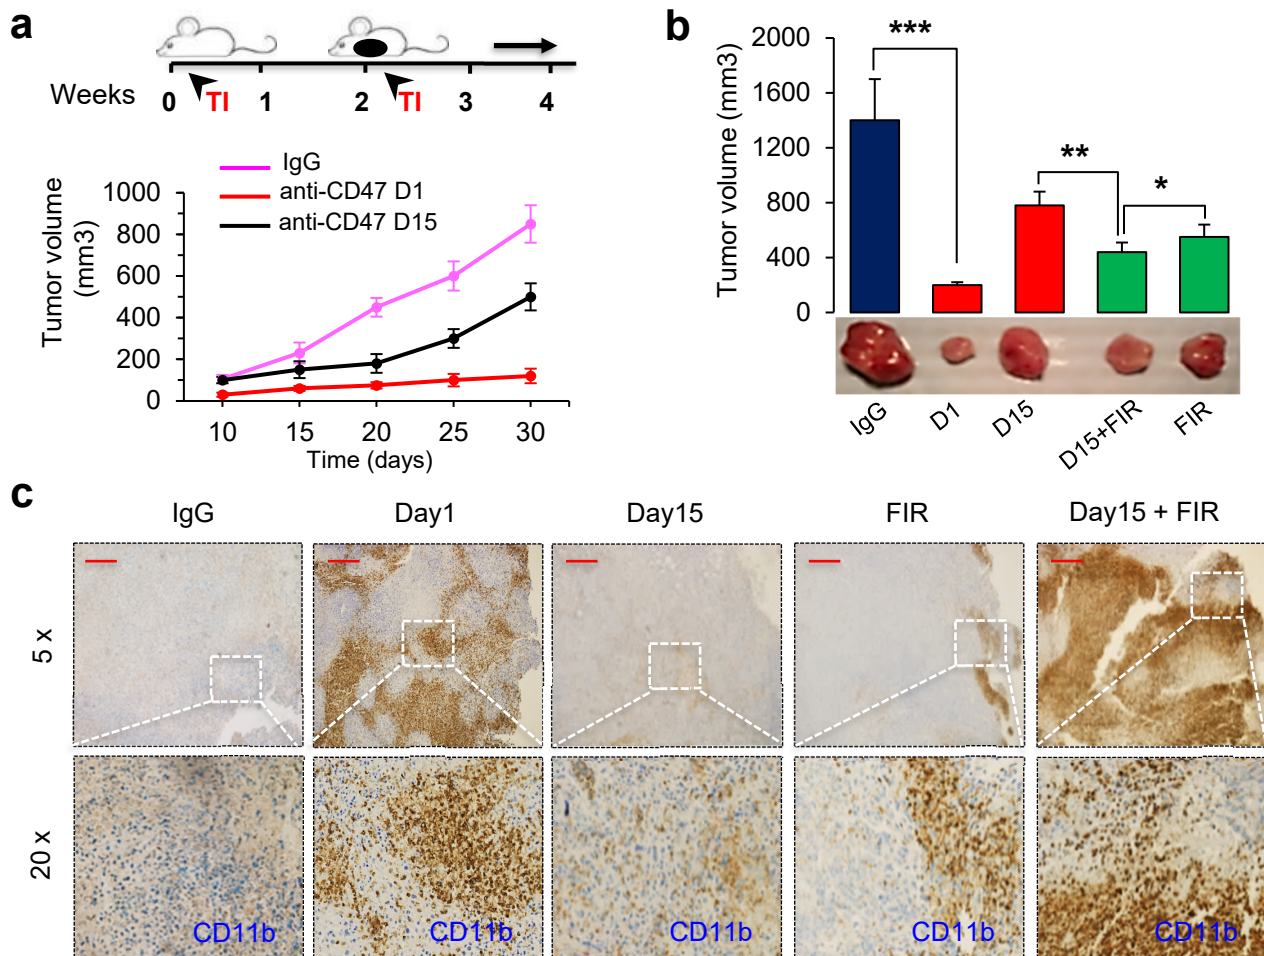

**Supplementary Figure 9. Radiation-mediated control of mouse orthotopic breast tumors were synergized with anti-CD47 antibody.**

(a) Syngeneic mouse breast tumors were generated by inoculation of  $5 \times 10^4$  mouse breast tumor 4T1 cells and TI was started by injection of 50  $\mu$ l PBS containing 100  $\mu$ g of anti-mouse CD47 F (ab') fragments into the mammary fat pads (Day 1), into tumor tissues (Day 15) every other day with IgG injection as control with or without FIR (start at Day 15, 5 Gy/day for 4 days). Tumor sizes were measured at Day 30. (b) Representative tumor images.  $n = 10$ ,  $*P < 0.05$ ,  $**P < 0.01$ ,  $***P < 0.001$ ). (c) IHC of CD11b<sup>+</sup> macrophages in 4T1 tumors treated with CD47 antibody, RT or combination ( $n = 5$ ; representative images were shown with 5 x magnification above, or 20 x magnification bottom; scale bar = 100  $\mu$ M).

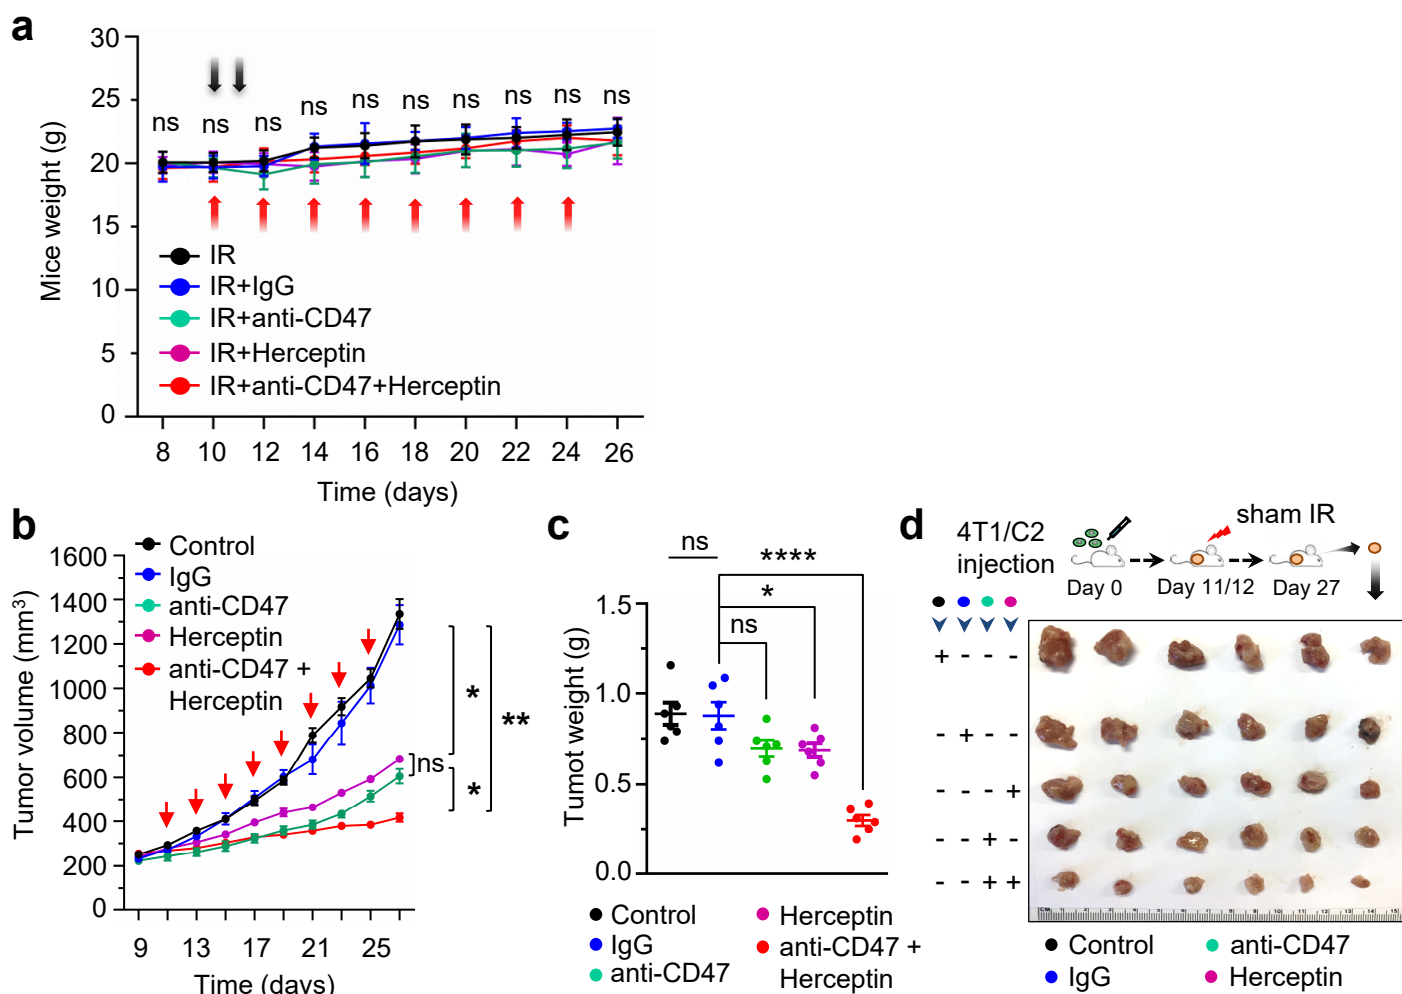

**Supplementary Figure 10. Mice weight and tumor growth with indicated treatments.** (a) No obvious toxicity detected by measuring mouse body weight during the course of treatment with radiation combined with anti-CD47 and anti-HER2 antibodies. BALB/c mice ( $n = 6$  per group) transplanted mammary fat pad with  $5 \times 10^5$  radioresistant 4T1/C2 cells. Mice were intratumorally injected with PBS, IgG, Herceptin (5 mg/kg), anti-CD47 antibody (5 mg/kg) or both antibodies every other day since day 10. All the tumors were treated with local RT with 5 Gy per fraction for 2 fractions at day 10 and day 11. Mice body weights were measured at each indicated time point, two-tailed unpaired t-test. Tumor volumes (b) and tumor weights at the end of experiments (c), and representative images (d) of mouse syngeneic breast tumors generated with radioresistant 4T1/C2 cells and treated with intratumorally injection of PBS (Control), IgG (Control), anti-CD47 antibody (5 mg/kg), Herceptin (5 mg/kg), or combination both antibodies every other day starting at day 11 (red arrow) after cell inoculation in the 4<sup>th</sup> mammary fat pad. Sham IR, sham irradiation ( $n = 6$ , Mean  $\pm$  SEM, ns = not significant, \* $P < 0.05$ , \*\* $P < 0.01$ , \*\*\*\* $P < 0.0001$ ).

| Abbreviation | Tumor Types                                                      | Normal (n) | Tumor (n) |
|--------------|------------------------------------------------------------------|------------|-----------|
| BLCA         | Bladder urothelial carcinoma                                     | 28         | 404       |
| BRCA         | Breast invasive carcinoma                                        | 291        | 1085      |
| CESC         | Cervical squamous cell carcinoma and endocervical adenocarcinoma | 13         | 306       |
| CHOL         | Cholangio carcinoma                                              | 9          | 36        |
| COAD         | Colon adenocarcinoma                                             | 349        | 275       |
| DLBC         | Lymphoid Neoplasm Diffuse Large B-cell Lymphoma                  | 337        | 47        |
| GBM          | Glioblastoma multiforme                                          | 207        | 163       |
| LGG          | Brain lower grade glioma                                         | 207        | 518       |
| LIHC         | Live hepatocellular carcinoma                                    | 160        | 369       |
| LUAD         | Lung adenocarcinoma                                              | 347        | 483       |
| OV           | Ovarian serous cystadenocarcinoma                                | 88         | 426       |
| PAAD         | Pancreatic adenocarcinoma                                        | 171        | 179       |
| READ         | Rectum adenocarcinoma                                            | 318        | 92        |
| STAD         | Stomach adenocarcinoma                                           | 211        | 408       |
| THYM         | Thymoma                                                          | 339        | 118       |
| UCEC         | Uterine Corpus Endometrial Carcinoma                             | 91         | 174       |
| UCS          | Uterine Carcinosarcoma                                           | 78         | 57        |

**Supplementary Table 1.** Numbers and cancer types for distribution of CD47 and HER2 expression analyzed from 17 types of human cancers and their adjacent normal tissues (acquired from GEPIA database).
